# Supplementary material for: A comprehensive survey of the mutagenic impact of common cancer cytotoxics
Source: PubMed Central journal article supplement (PMC4862131; doi:10.1186/s13059-016-0963-7), 2016-05-09

**Figure S1**

(A) Mock treatment, cisplatin and cyclophosphamide induced SNV mutations in the context of the neighbouring bases, not normalised to the genomic frequency of base triplets. The mean of all sequenced bases samples is shown.

(B) The share of each triplet type in the human and chicken genome.

**A**

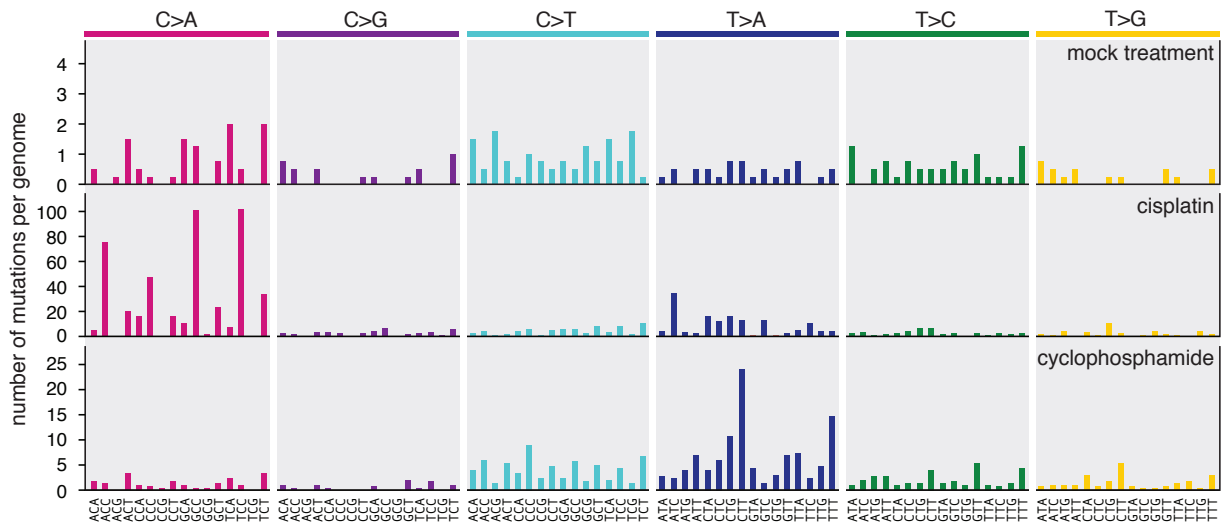

**B**

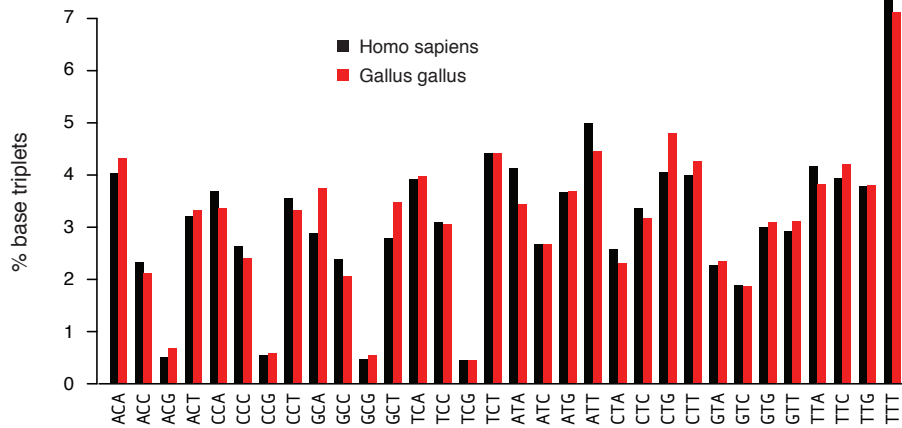

**Figure S2**

(A) NNGAN>NNGTN cisplatin-induced mutations separated by base context and ordered by the number of occurrence. Mutations that could be explained by GG or AG intrastrand crosslinks immediately upstream of the mutated base are shown in red, mutations at the 5' base of AG sequences are shown in blue, while mutations in the grey columns cannot be explained by putative GG or AG crosslinks overlapping or immediately upstream of the mutated position. (B-D) Schematic drawings of the replicative process that may generate GA>GT mutations in a GGA or AGA context (B); in a GAG context (C); and at GA sites with no overlapping GG or AG (D). Putative intrastrand crosslinks and monoadducts are marked; non-canonical base pairing is shown with a zig-zag symbol. The contribution of each mutation class to the total number of observed classes is shown, with ranges indicated where certain mutations could belong to either of two classes.

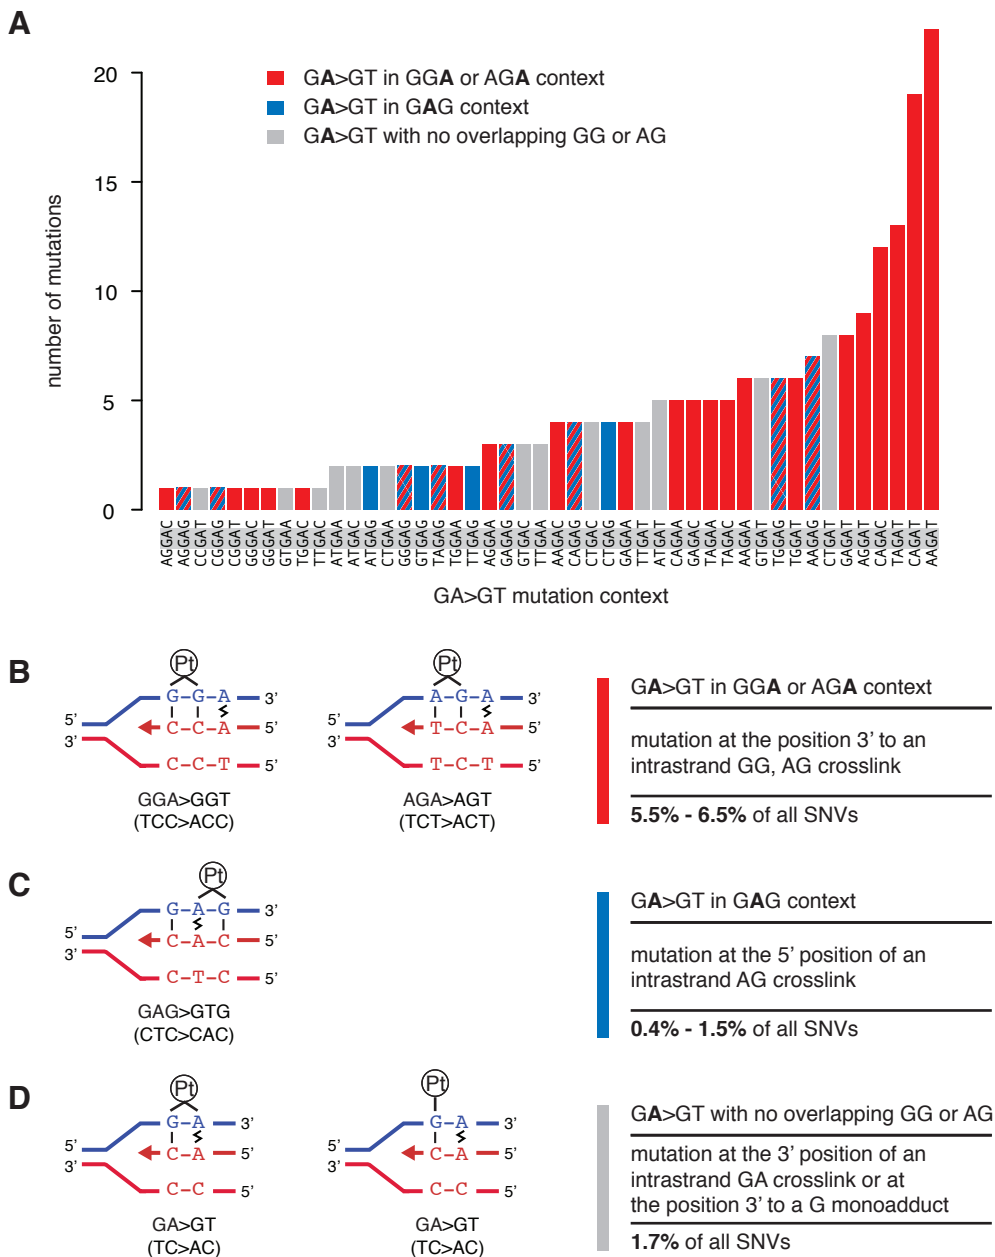

**Figure S3**

Sequence context of SNVs induced by cisplatin or cyclophosphamide treatment. The position of the mutated base is marked with an arrow below the panels.

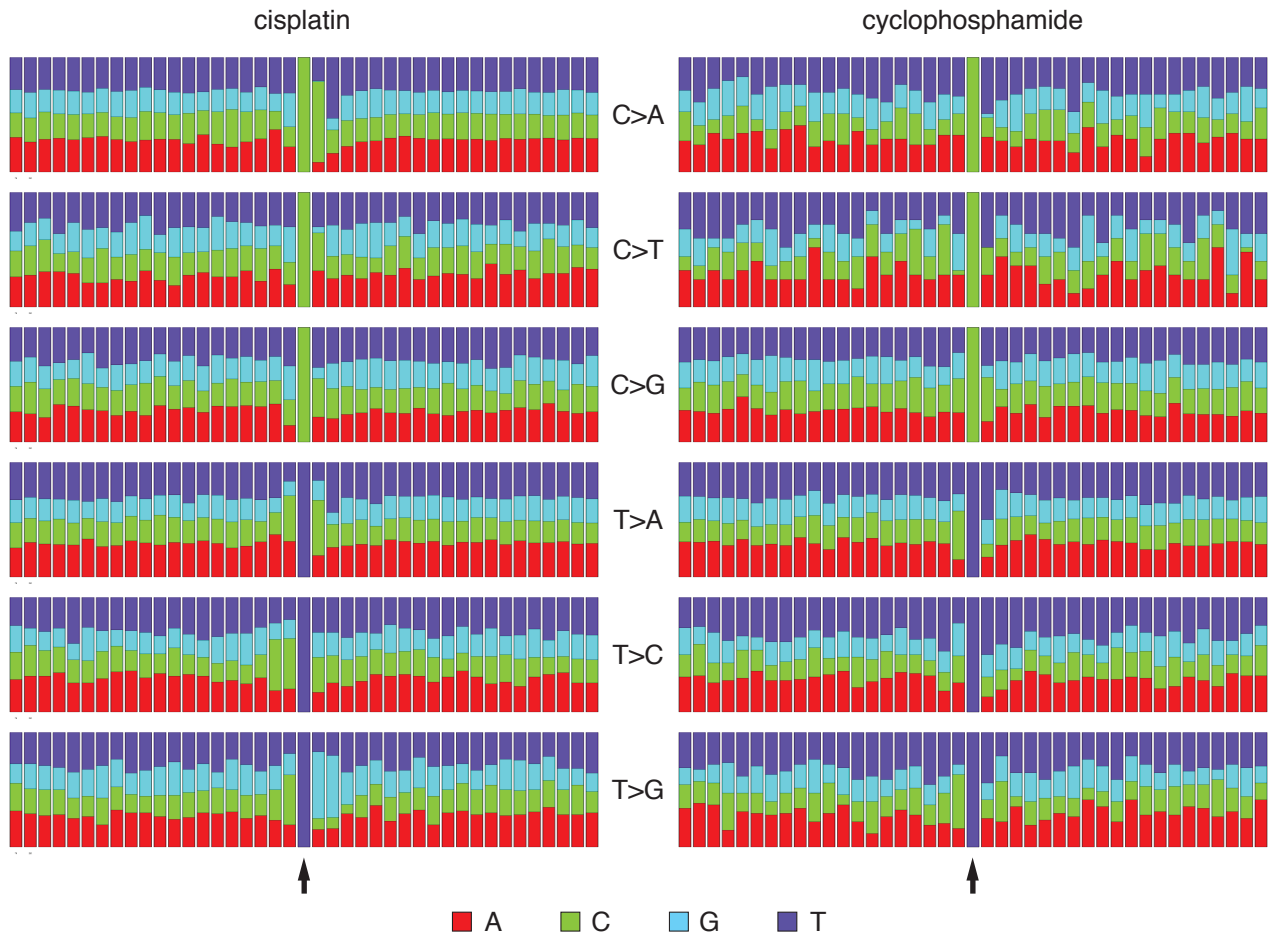

**Figure S4**

The number of two-base cisplatin-induced deletions, presented according to the deleted sequence, and separated per sequenced cell clone of origin.

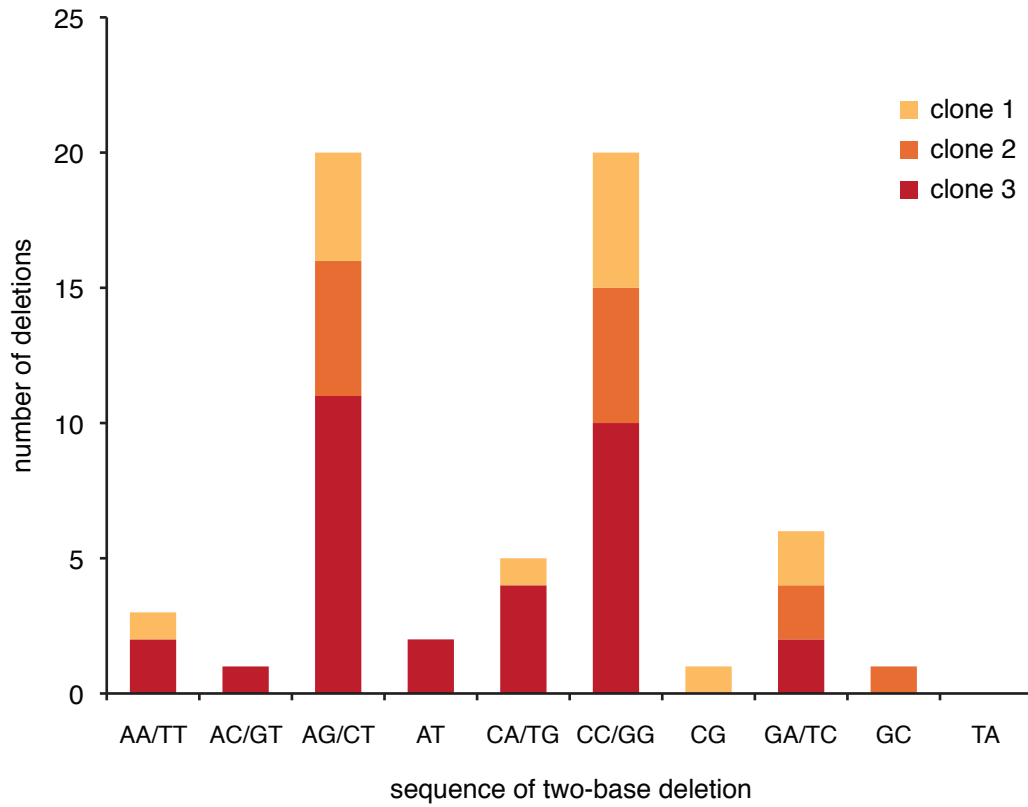

**Figure S5**

SNV mutations in the three samples of each treatment are overlaid on one genome, and the distance of each SNV mutation from the previous SNV on the same chromosome is plotted against the genomic position of the mutation. The colour of the dot indicates whether the previous mutation was in the same sequenced clone (blue) or a different clone (red). Mutational hotspots, which would appear as closely spaced mutations in different samples (red dots) are not seen. Thin dashed lines indicate chromosome boundaries. Chromosomes are shown in numerical order, chromosome Z is shown last on the right.

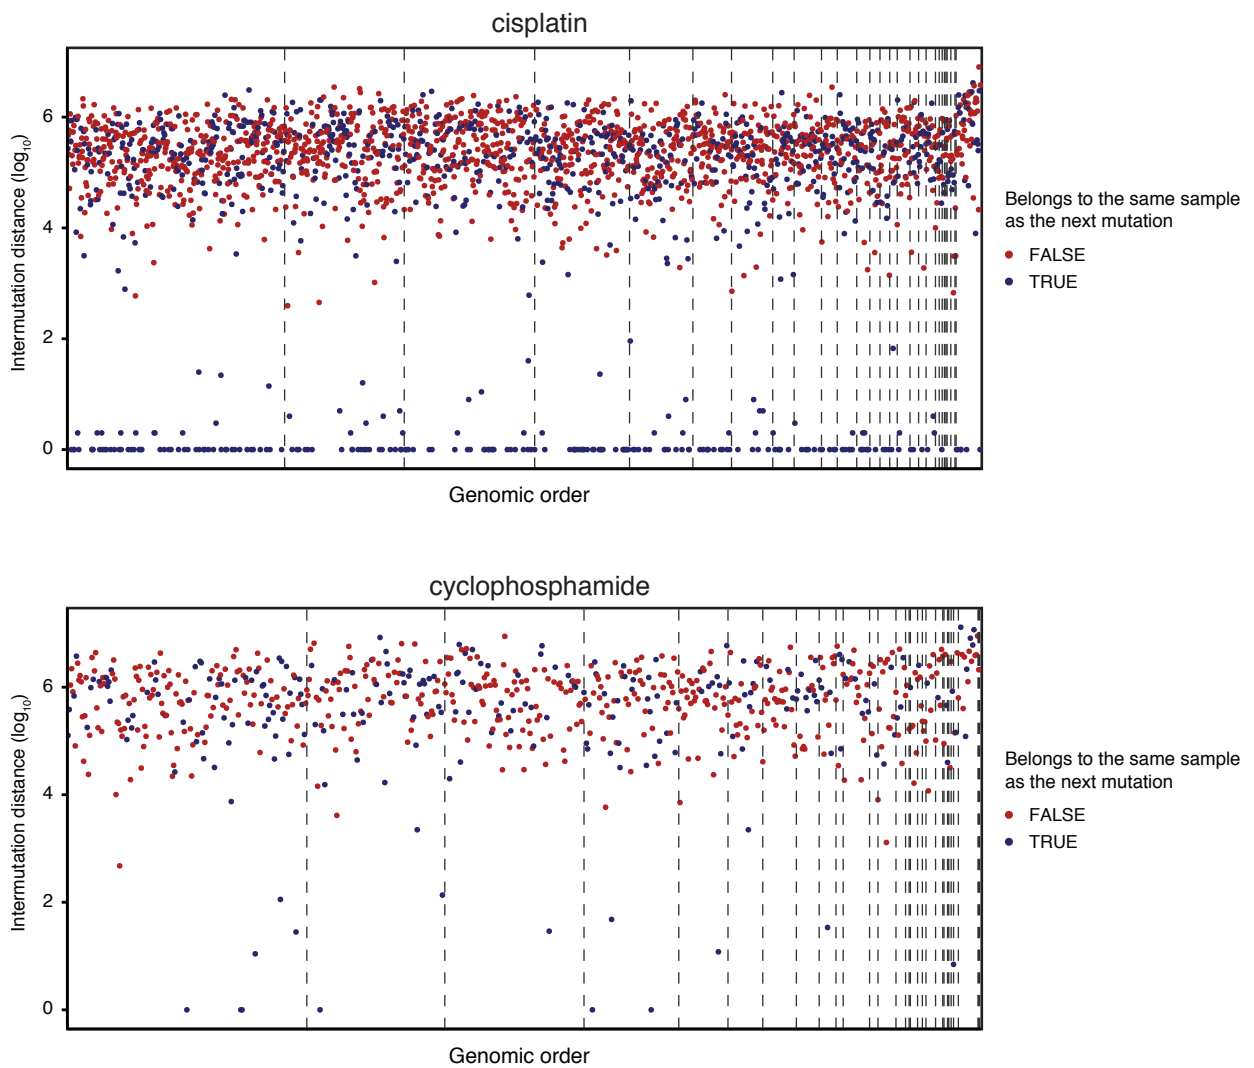

**Figure S6**

The number and spectrum of SNV mutations in each individual sequenced genome in the context of the neighbouring bases, not normalised to the genomic frequency of base triplets. The treatments and clone numbers are shown on the left.

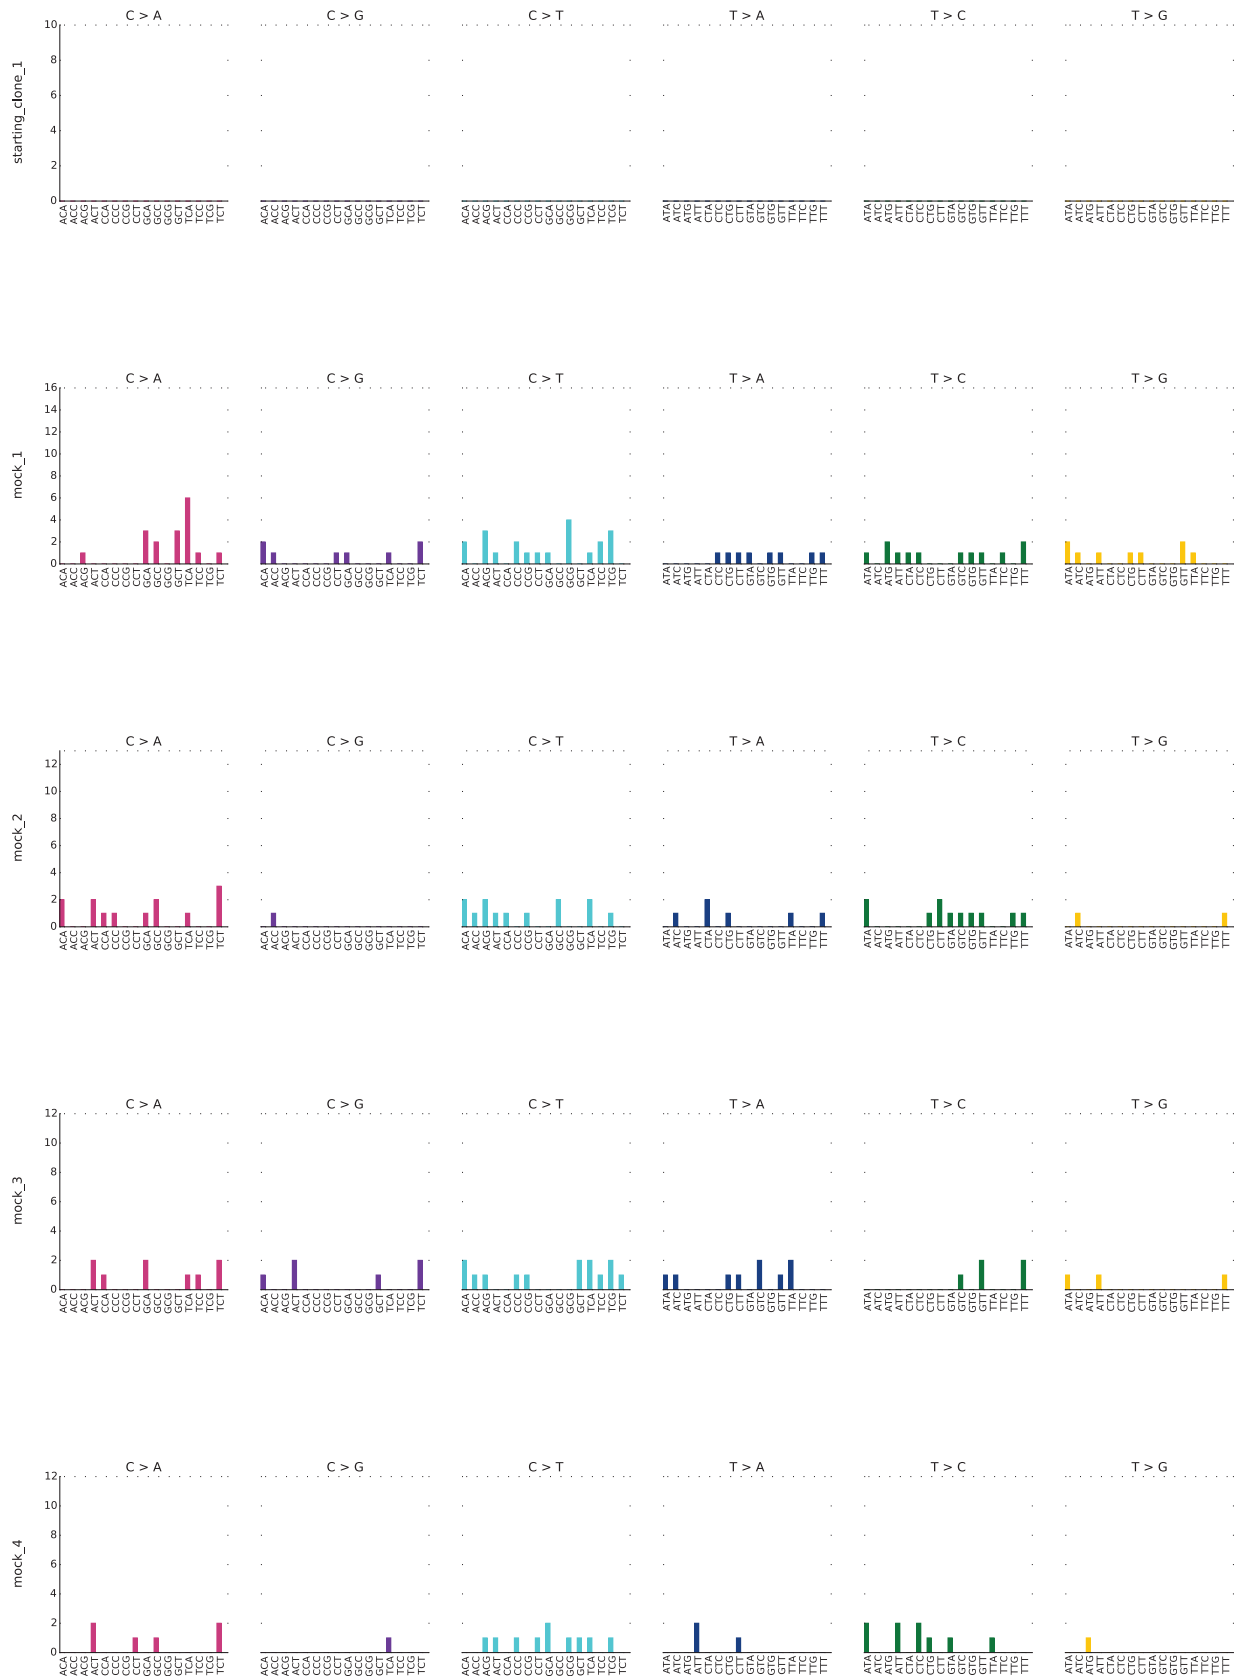



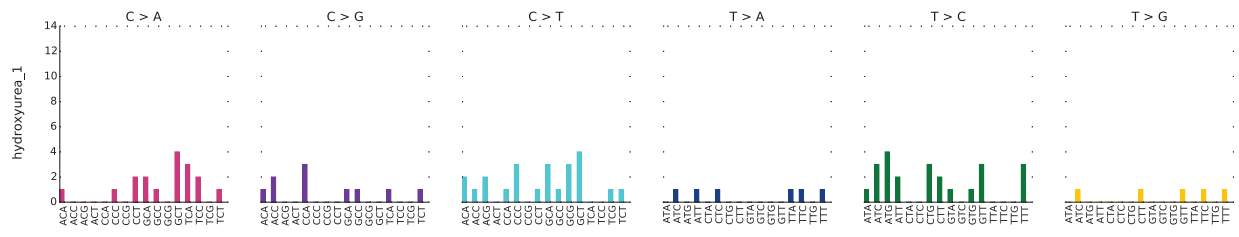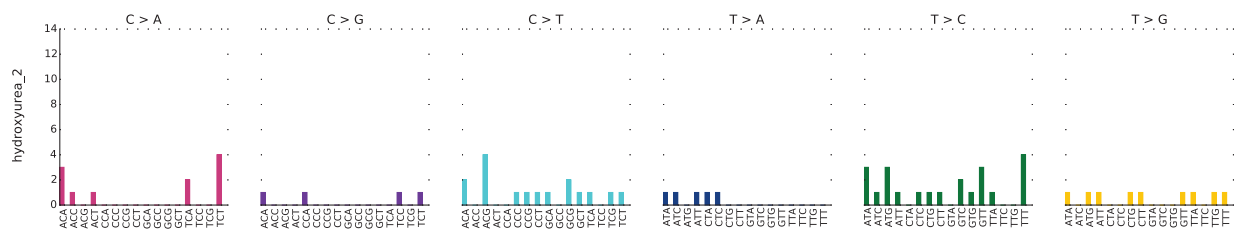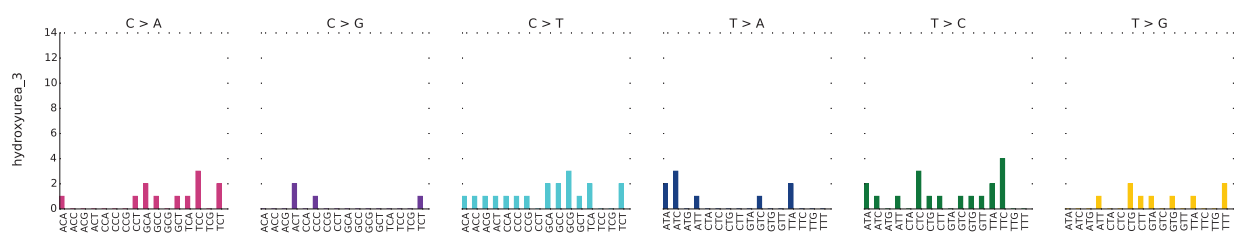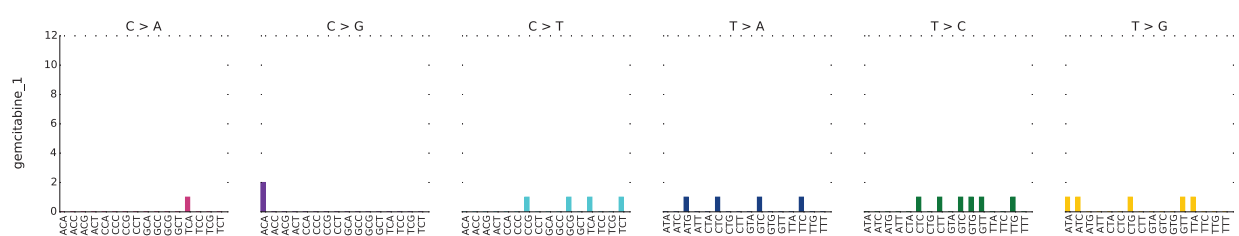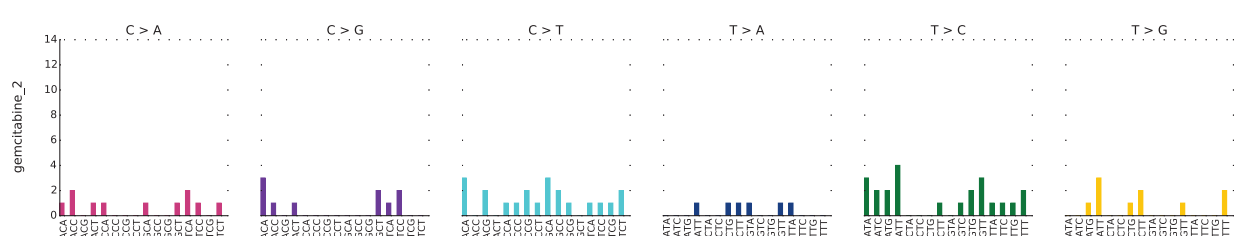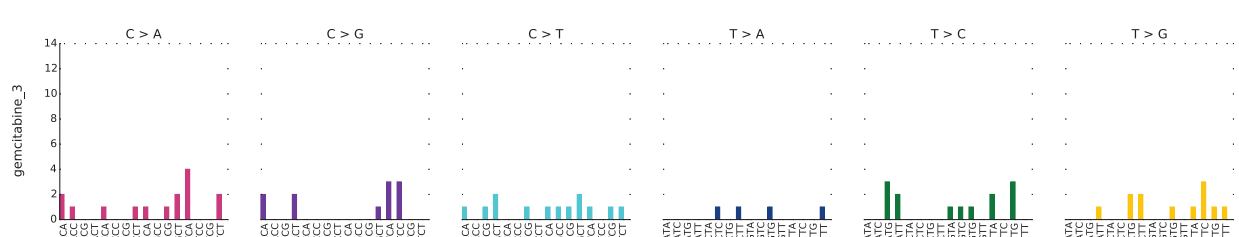



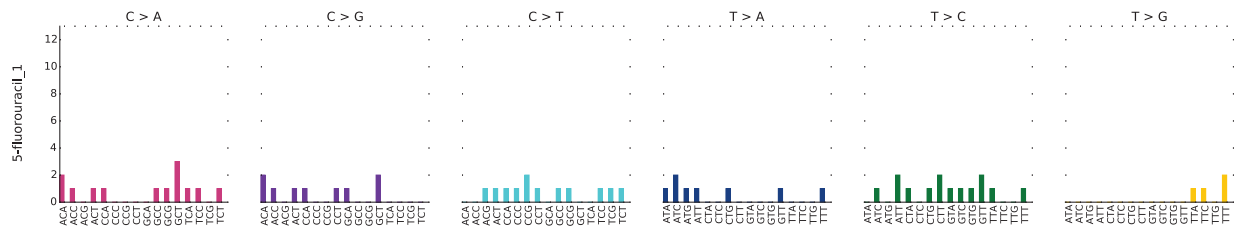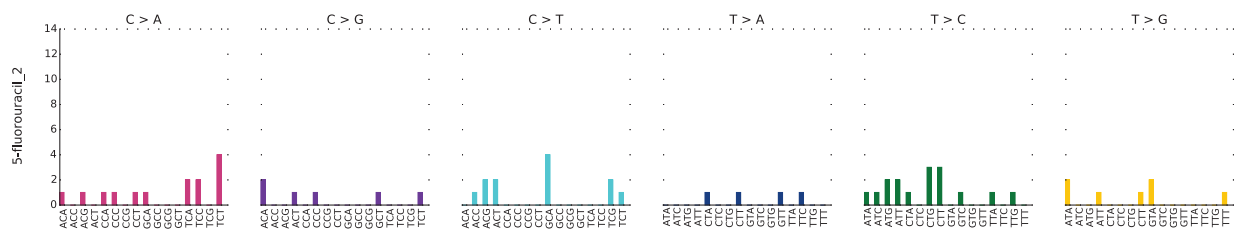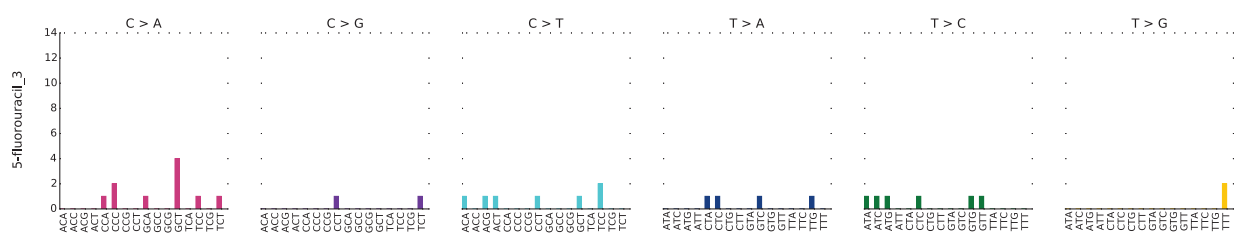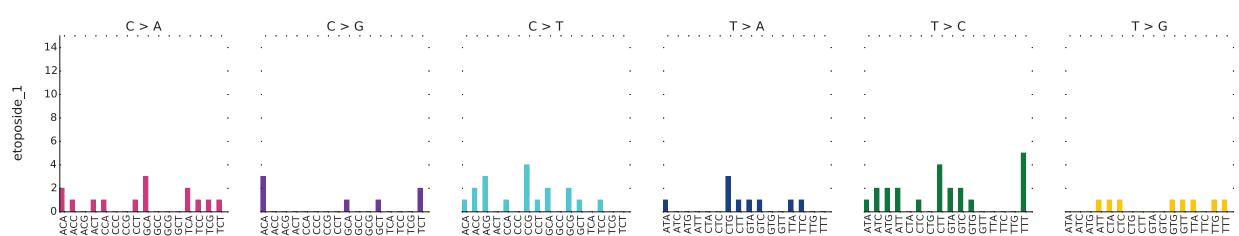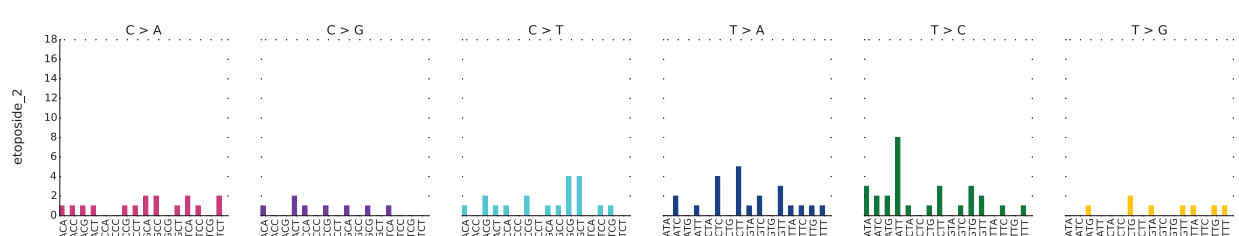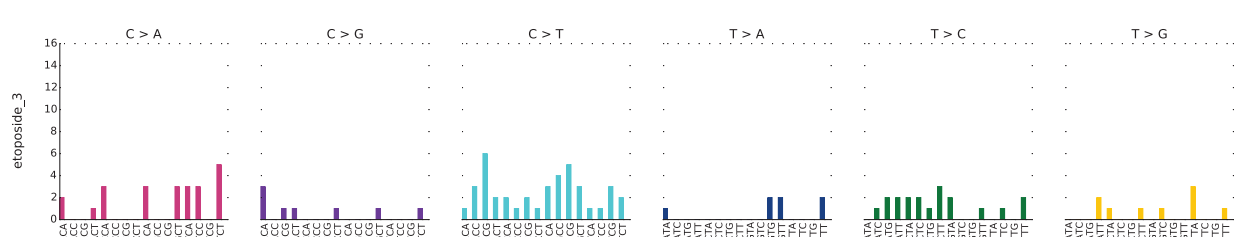

Supplement: 13059_2016_963_MOESM2_ESM.pdf [file 13059_2016_963_MOESM2_ESM.pdf]
